# Supplementary material for: Plant Cation-Chloride Cotransporters (CCC): Evolutionary Origins and Functional Insights
Source: Int J Mol Sci. 2018 Feb 6;19(2):492. doi: 10.3390/ijms19020492 (PMC5855714; doi:10.3390/ijms19020492)
Supplement: Supplementary file 1 [file ijms-19-00492-s001.xlsx]

## Sheet: Table S1
Table S1: Accession number of proteins used for amino acid sequence alignment and phylogenetic analysis
	Common name	Species name	NCBI Gene ID	Protein Accession	Gene name
	Tomato	Solanum lycopersicum	LOC101263066	XP_004231552.1	SlCCC1.1
			LOC101252551	XP_004233139.1	SlCCC1.2
	Potato	Solanum tuberosum	LOC102606011	XP_006359094.1	StCCC1.1
			LOC102589794	XP_006352985.1	StCCC1.2
	Moss	Physcomitrella patens	PHYPADRAFT_112971	XP_001752655	PpCCC1.1
			PHYPADRAFT_175763	XP_001754624	PpCCC1.2
			PHYPADRAFT_204831	XP_001756366	PpCCC1.3
			PHYPADRAFT_217277	XP_001771559	PpCCC1.4
			PHYPADRAFT_133703	XP_001768719.1	PpCCC2.3
			PHYPADRAFT_177110	XP_001756125.1	PpCCC2.1
			PHYPADRAFT_121529	XP_001759341.1	PpCCC2.2
	Grapevine	Vitis vinifera	CCC1	XP_003633037	VviCCC1
	Arabidopsis	Arabidopsis thaliana	CCC1	NP_849732	AtCCC1
	Sorghum	Sorghum bicolor	LOC8083761	XP_002440935.1	SbCCC1.2
			LOC8070641	XP_021317395.1	SbCCC1.1
	Selaginella	Selaginella moellendorffii	SELMODRAFT_150343	XP_002975190	SmCCC1.1
			SELMODRAFT_151983	XP_002977594	SmCCC1.2
			SELMODRAFT_425250	XP_002986283	SmCCC2.1
			SELMODRAFT_447444	XP_002988769	SmCCC2.2
	Soybean	Glycine max	LOC100780371	XP_003533835	GmCCC1.1
			LOC100795205	XP_003546564	GmCCC1.2
	Barrelclover	Medicago truncatula	MTR_2g048510	XP_003595505	MtCCC1
	Brachypodium	Brachypodium distachyon	LOC100840956	XP_003557250	BdCCC1.1
			LOC100827761	XP_003565703	BdCCC1.3
			LOC100838289	XP_003568633	BdCCC1.2
	Arabidopsis lyrata	Arabidopsis lyrata	LOC9326933	XP_020866910.1	AlyCCC1
	Liverwort	Marchantia polymorpha	AXG93_1054s1000	OAE34316	MpoCCC1
			AXG93_3267s1010	OAE34634.1	MpoCCC2
	Micromonas pusilla	Micromonas pusilla CCMP1545	MICPUCDRAFT_47619	XP_003059648	MpCCC2
	Micromonas commoda	Micromonas commoda	MICPUN_60430	XP_002503773.1	McCCC2
	Rice	Oryza sativa (japonica)	LOC4345272	XP_015650142	OsCCC1.1
			LOC4323905	XP_015632062	OsCCC1.2
	Corn	Zea Mays	LOC103631489	AQK85348	ZmCCC1.2
			LOC103635572	XP_020398865.1	ZmCCC1.1
			LOC103655803	XP_020408372.1	ZmCCC1.3
	Amborella	Amborella trichopoda	LOC18427189	XP_006836309.1	AtrCCC1
	Peach	Prunus persica	LOC18781060	XP_007213604.2	PpeCCC1
	Mandarin	Citrus clementina	CICLE_v10014154mg	XP_006448939.1	CcCCC1
	Rose Gum	Eucalyptus grandis	LOC104440719	XP_010051972	EgCCC1
	Yeast	Saccharomyces cerevisiae	Vhc1p	NP_009794.3	Vhc1

## Sheet: Table S2
Table S2: Amino acid identity matrix for the 39 predicted plant CCC proteins used in this study.
	StCCC1.2	SlCCC1.2	StCCC1.1	SlCCC1.1	AtCCC1	AlyCCC1	GmCCC1.2	GmCCC1.1	MtCCC1	VviCCC1	PpeCCC1	EgCCC1	CcCCC1	SbCCC1.2	ZmCCC1.1	ZmCCC1.2	OsCCC1.1	BdCCC1.2	BdCCC1.1	BdCCC1.3	OsCCC1.2	SbCCC1.1	ZmCCC1.3	AtrCCC1	MpoCCC1	PpCCC1.2	SmCCC1.2	SmCCC1.1	PpCCC1.4	PpCCC1.3	PpCCC1.1	PpCCC2.3	PpCCC2.2	PpCCC2.1	SmCCC2.2	SmCCC2.1	MpoCCC2	MpCCC2	McCCC2
StCCC1.2		98.774	86.952	86.864	78.846	79.15	78.034	77.756	77.912	79.555	78.995	79.016	78.91	75.05	74.751	71.429	75.348	74.405	74.254	77.106	71.728	74.2	73.959	75.477	64.133	62.351	71.251	71.251	66.891	67.667	66.034	26.185	26.082	27.711	23.427	23.427	21.501	17.122	23.292
SlCCC1.2	98.774		87.054	86.864	78.846	79.15	77.733	77.455	77.41	80.061	78.794	79.217	79.011	75.05	74.553	71.429	75.547	74.405	74.354	77.322	71.928	74.307	74.066	75.678	64.23	62.45	71.251	71.251	66.891	67.667	66.245	26.185	26.082	27.82	23.427	23.427	21.585	17.213	23.292
StCCC1.1	86.952	87.054		98.584	79.757	79.656	78.842	78.365	77.711	81.275	80.02	80.943	80.727	75.646	75.149	71.996	76.64	75	74.876	78.294	72.627	75.267	75.347	76.281	64.004	62.857	72.266	72.266	67.789	68.889	67.405	26.293	26.495	27.163	23.313	23.313	20.71	17.304	23.993
SlCCC1.1	86.864	86.864	98.584		79.656	79.555	78.643	78.265	77.711	81.275	80.321	80.943	80.626	75.646	75.149	71.996	76.74	75.099	74.975	78.294	72.727	75.267	75.454	76.406	63.908	62.759	72.153	72.153	67.677	68.778	67.194	26.429	26.522	27.303	23.333	23.333	20.728	17.411	24.014
AtCCC1	78.846	78.846	79.757	79.656		99.283	78.056	77.477	78.916	80.468	79.016	80.943	81.155	75.174	74.875	71.537	75.773	74.229	74.776	76.216	72.317	74.28	74.252	75.327	63.77	63.727	71.928	71.928	67.677	68.556	67.405	26.803	27.066	28.43	23.747	23.747	21.658	18.215	23.73
AlyCCC1	79.15	79.15	79.656	79.555	99.283		78.156	77.578	79.016	80.285	78.815	80.843	81.358	75.174	74.875	71.537	75.474	74.229	74.776	76.108	72.217	73.959	74.038	75.327	64.063	63.664	72.041	72.041	67.677	68.556	67.194	26.588	27.066	28.211	23.747	23.747	21.658	18.215	23.555
GmCCC1.2	78.034	77.733	78.842	78.643	78.056	78.156		96.781	89.537	80.382	81.048	80.924	79.739	74.603	74.206	71.199	75.423	73.684	73.978	76.998	70.846	74.043	73.589	73.427	64.403	62.093	71.139	71.139	67.228	67.556	66.315	27.224	27.629	28.697	23.997	23.997	21.633	17.395	23.818
GmCCC1.1	77.756	77.455	78.365	78.265	77.477	77.578	96.781		89.336	79.92	81.388	80.561	79.68	74.504	74.107	71.105	75.224	73.784	74.004	76.699	70.875	73.936	73.376	73.054	64.306	62.093	71.139	71.139	67.116	67.778	66.209	27.088	27.526	28.587	24.084	24.084	21.465	17.213	23.73
MtCCC1	77.912	77.41	77.711	77.711	78.916	79.016	89.537	89.336		80.785	82.897	81.809	80.04	75.496	75.496	71.86	76.068	75.074	74.925	77.131	71.571	74.52	74.066	74.274	63.867	61.645	71.026	71.026	66.667	67.444	66.245	27.82	28.351	29.025	24.171	24.171	21.801	17.304	23.905
VviCCC1	79.555	80.061	81.275	81.275	80.468	80.285	80.382	79.92	80.785		84.343	84.763	85	79.021	78.821	75.38	79.084	78.764	78.779	80.432	74.824	76.734	76.282	77.99	66.406	64.028	73.732	73.732	67.565	68	68.249	26.717	27.216	27.492	23.555	23.555	21.483	17.486	23.818
PpeCCC1	78.995	78.794	80.02	80.321	79.016	78.815	81.048	81.388	82.897	84.343		85.166	82.578	76.64	76.243	73.132	76.938	76.318	76.723	77.73	72.736	74.893	74.786	77.1	65.527	62.996	72.83	72.83	67.901	68.444	68.038	27.341	27.818	28.571	24.168	24.168	22.044	17.443	24.495
EgCCC1	79.016	79.217	80.943	80.943	80.943	80.843	80.924	80.561	81.809	84.763	85.166		84.004	77.458	76.961	73.535	77.16	76.839	76.693	78.51	72.863	75.267	75.133	77.323	65.951	63.439	72.604	72.604	68.013	68.889	68.249	26.502	27.113	28.368	24.52	24.52	21.633	17.942	24.431
CcCCC1	78.91	79.011	80.727	80.626	81.155	81.358	79.739	79.68	80.04	85	82.578	84.004		77.59	77.092	74.028	77.16	76.243	76.846	79.634	73.9	75.851	75.08	76.152	65.141	63.573	71.798	71.798	67.897	68.439	66.456	26.609	26.619	27.601	23.555	23.555	21.483	17.668	23.643
SbCCC1.2	75.05	75.05	75.646	75.646	75.174	75.174	74.603	74.504	75.496	79.021	76.64	77.458	77.59		98.297	93.619	92.522	91.417	90.918	85.714	82.136	83.936	82.748	76.869	66.472	63.96	73.82	73.82	68.498	68.701	66.28	26.539	26.919	28.261	23.785	23.785	21.859	18.009	23.847
ZmCCC1.1	74.751	74.553	75.149	75.149	74.875	74.875	74.206	74.107	75.496	78.821	76.243	76.961	77.092	98.297		92.476	92.024	90.719	90.02	85.607	81.836	83.723	82.428	76.371	66.667	63.861	73.82	73.82	68.498	68.59	65.964	26.567	26.947	28.183	23.805	23.805	21.776	17.919	23.847
ZmCCC1.2	71.429	71.429	71.996	71.996	71.537	71.537	71.199	71.105	71.86	75.38	73.132	73.535	74.028	93.619	92.476		87.571	86.515	86.23	81.365	78.158	79.516	78.485	73.15	63.603	61.321	69.819	69.819	64.687	65.021	62.7	25.355	25.759	26.943	23.051	23.051	21.202	17.399	23.181
OsCCC1.1	75.348	75.547	76.64	76.74	75.773	75.474	75.423	75.224	76.068	79.084	76.938	77.16	77.16	92.522	92.024	87.571		91.717	91.508	86.667	81.854	84.239	83.369	76.892	66.634	64.158	73.903	73.903	68.35	68.667	66.702	26.964	27.533	28.804	24	24	21.728	17.828	23.673
BdCCC1.2	74.405	74.405	75	75.099	74.229	74.229	73.684	73.784	75.074	78.764	76.318	76.839	76.243	91.417	90.719	86.515	91.717		96.204	86.129	81.076	83.6	82.729	75.323	66.927	63.834	73.003	73.003	68.238	68.778	66.245	26.539	26.817	28.37	23.785	23.785	21.859	17.647	23.412
BdCCC1.1	74.254	74.354	74.876	74.975	74.776	74.776	73.978	74.004	74.925	78.779	76.723	76.693	76.846	90.918	90.02	86.23	91.508	96.204		86.129	81.419	84.239	83.369	75.649	66.634	63.591	73.228	73.228	67.677	68.222	66.034	26.539	26.817	28.37	23.785	23.785	21.943	17.557	23.586
BdCCC1.3	77.106	77.322	78.294	78.294	76.216	76.108	76.998	76.699	77.131	80.432	77.73	78.51	79.634	85.714	85.607	81.365	86.667	86.129	86.129		86.975	85.929	85.054	77.503	69.694	67.701	73.251	73.251	67.717	67.817	66.416	26.524	26.674	28.009	24.464	24.464	21.525	17.47	23.447
OsCCC1.2	71.728	71.928	72.627	72.727	72.317	72.217	70.846	70.875	71.571	74.824	72.736	72.863	73.9	82.136	81.836	78.158	81.854	81.076	81.419	86.975		84.878	83.582	72.773	64.098	62.488	71.766	71.766	67.228	67.111	64.768	26.17	26.127	27.53	23.458	23.458	21.459	17.014	22.889
SbCCC1.1	74.2	74.307	75.267	75.267	74.28	73.959	74.043	73.936	74.52	76.734	74.893	75.267	75.851	83.936	83.723	79.516	84.239	83.6	84.239	85.929	84.878		94.237	74.84	67.745	66.737	71.348	71.348	66.928	67.148	64.656	25.851	26.23	26.957	23.415	23.415	21.189	17.014	22.541
ZmCCC1.3	73.959	74.066	75.347	75.454	74.252	74.038	73.589	73.376	74.066	76.282	74.786	75.133	75.08	82.748	82.428	78.485	83.369	82.729	83.369	85.054	83.582	94.237		74.92	68.339	66.808	71.654	71.654	66.554	67.444	65.042	25.851	26.203	26.957	23.239	23.239	21.189	17.104	22.541
AtrCCC1	75.477	75.678	76.281	76.406	75.327	75.327	73.427	73.054	74.274	77.99	77.1	77.323	76.152	76.869	76.371	73.15	76.892	75.323	75.649	77.503	72.773	74.84	74.92		66.96	65.204	76.55	76.55	69.585	69.444	68.565	27.312	27.618	28.244	23.847	23.847	21.159	17.877	23.386
MpoCCC1	64.133	64.23	64.004	63.908	63.77	64.063	64.403	64.306	63.867	66.406	65.527	65.951	65.141	66.472	66.667	63.603	66.634	66.927	66.634	69.694	64.098	67.745	68.339	66.96		70.525	80.735	80.846	73.119	73.932	71.488	26.321	26.892	27.53	24.376	24.376	22.129	18.659	23.519
PpCCC1.2	62.351	62.45	62.857	62.759	63.727	63.664	62.093	62.093	61.645	64.028	62.996	63.439	63.573	63.96	63.861	61.321	64.158	63.834	63.591	67.701	62.488	66.737	66.808	65.204	70.525		76.914	77.027	72.676	72.506	71.776	26.915	26.749	27.283	24.324	24.237	21.925	19.005	23.325
SmCCC1.2	71.251	71.251	72.266	72.153	71.928	72.041	71.139	71.139	71.026	73.732	72.83	72.604	71.798	73.82	73.82	69.819	73.903	73.003	73.228	73.251	71.766	71.348	71.654	76.55	80.735	76.914		99.886	74.212	73.649	75.338	26.652	27.013	27.511	25.417	25.325	21.968	19.164	23.843
SmCCC1.1	71.251	71.251	72.266	72.153	71.928	72.041	71.139	71.139	71.026	73.732	72.83	72.604	71.798	73.82	73.82	69.819	73.903	73.003	73.228	73.251	71.766	71.348	71.654	76.55	80.846	77.027	99.886		74.324	73.761	75.45	26.652	27.013	27.511	25.417	25.325	21.968	19.164	23.843
PpCCC1.4	66.891	66.891	67.789	67.677	67.677	67.677	67.228	67.116	66.667	67.565	67.901	68.013	67.897	68.498	68.498	64.687	68.35	68.238	67.677	67.717	67.228	66.928	66.554	69.585	73.119	72.676	74.212	74.324		90.632	76.298	25.106	26.165	25.873	24.583	24.49	21.441	18.347	23.231
PpCCC1.3	67.667	67.667	68.889	68.778	68.556	68.556	67.556	67.778	67.444	68	68.444	68.889	68.439	68.701	68.59	65.021	68.667	68.778	68.222	67.817	67.111	67.148	67.444	69.444	73.932	72.506	73.649	73.761	90.632		75.978	24.574	25.708	25.983	24.287	24.287	21.447	18.347	23.231
PpCCC1.1	66.034	66.245	67.405	67.194	67.405	67.194	66.315	66.209	66.245	68.249	68.038	68.249	66.456	66.28	65.964	62.7	66.702	66.245	66.034	66.416	64.768	64.656	65.042	68.565	71.488	71.776	75.338	75.45	76.298	75.978		26.277	26.543	27.838	23.835	23.835	21.56	17.984	23.493
PpCCC2.3	26.185	26.185	26.293	26.429	26.803	26.588	27.224	27.088	27.82	26.717	27.341	26.502	26.609	26.539	26.567	25.355	26.964	26.539	26.539	26.524	26.17	25.851	25.851	27.312	26.321	26.915	26.652	26.652	25.106	24.574	26.277		76.201	78.201	54.473	54.374	40.945	24.106	33.687
PpCCC2.2	26.082	26.082	26.495	26.522	27.066	27.066	27.629	27.526	28.351	27.216	27.818	27.113	26.619	26.919	26.947	25.759	27.533	26.817	26.817	26.674	26.127	26.23	26.203	27.618	26.892	26.749	27.013	27.013	26.165	25.708	26.543	76.201		78.143	54.396	54.396	42.409	24.465	34.229
PpCCC2.1	27.711	27.82	27.163	27.303	28.43	28.211	28.697	28.587	29.025	27.492	28.571	28.368	27.601	28.261	28.183	26.943	28.804	28.37	28.37	28.009	27.53	26.957	26.957	28.244	27.53	27.283	27.511	27.511	25.873	25.983	27.838	78.201	78.143		59.378	59.378	46.357	25.166	35.487
SmCCC2.2	23.427	23.427	23.313	23.333	23.747	23.747	23.997	24.084	24.171	23.555	24.168	24.52	23.555	23.785	23.805	23.051	24	23.785	23.785	24.464	23.458	23.415	23.239	23.847	24.376	24.324	25.417	25.417	24.583	24.287	23.835	54.473	54.396	59.378		99.715	47.201	26.497	37.073
SmCCC2.1	23.427	23.427	23.313	23.333	23.747	23.747	23.997	24.084	24.171	23.555	24.168	24.52	23.555	23.785	23.805	23.051	24	23.785	23.785	24.464	23.458	23.415	23.239	23.847	24.376	24.237	25.325	25.325	24.49	24.287	23.835	54.374	54.396	59.378	99.715		47.201	26.497	37.073
MpoCCC2	21.501	21.585	20.71	20.728	21.658	21.658	21.633	21.465	21.801	21.483	22.044	21.633	21.483	21.859	21.776	21.202	21.728	21.859	21.943	21.525	21.459	21.189	21.189	21.159	22.129	21.925	21.968	21.968	21.441	21.447	21.56	40.945	42.409	46.357	47.201	47.201		22.85	33.007
MpCCC2	17.122	17.213	17.304	17.411	18.215	18.215	17.395	17.213	17.304	17.486	17.443	17.942	17.668	18.009	17.919	17.399	17.828	17.647	17.557	17.47	17.014	17.014	17.104	17.877	18.659	19.005	19.164	19.164	18.347	18.347	17.984	24.106	24.465	25.166	26.497	26.497	22.85		45.574
McCCC2	23.292	23.292	23.993	24.014	23.73	23.555	23.818	23.73	23.905	23.818	24.495	24.431	23.643	23.847	23.847	23.181	23.673	23.412	23.586	23.447	22.889	22.541	22.541	23.386	23.519	23.325	23.843	23.843	23.231	23.231	23.493	33.687	34.229	35.487	37.073	37.073	33.007	45.574
